# Supplementary material for: ATAD2 mediates chromatin-bound histone chaperone turnover
Source: eLife. 2026 Jan 20;14:RP107582. doi: 10.7554/eLife.107582 (PMC12818868; doi:10.7554/eLife.107582)
Supplement: Supplementary file 1. [file elife-107582-supp1.xlsx]

## Sheet: Fig. 2A
Normalized HIRA/Tubulin bands
Replicates	Atad2 WT	Atad2 KO
Gel 1 (shown in paper)
#1	1	1.17911
#2	1.06712	1.14572
#3	0.589031	1.18861
Gel 2 (not shown)
#4	1	1.04203
#5	0.693206	1.19695

## Sheet: Fig. 7B
pre-PRM2/Tub (ELISA)
E/C Replicates	Atad2 WT	Atad2 KO
#1	1.61054	2.05245
#2	1.59176	2.28584
#3	1.43987	2.32942
#4	2.03857	2.02205

## Sheet: Fig. 8A
	No Decompaction		Decompaction
Replicates	Atad2 WT	Atad2 KO	Atad2 WT	Atad2 KO
#1	15.34	15.632	52.215	63.614
#2	17.166	16.874	48.097	50.597
#3	17.823	17.75	46.184	45.008
#4	14.317	14.828	48.685	68.835
#5	14.39	14.828	51.774	49.347
#6	16.654	16.581	33.388	60.819
#7	10.446	16.654	55.009	60.599
#8	17.093	16.362	48.538	67.512
#9	18.7	17.604	43.61	66.776
#10	18.262	16.216	46.332	54.348
#11	17.239	17.458	61.555	60.746
#12	15.34	15.778	47.214	75.748
#13	13.66	16.362	47.214	68.174
#14	14.901	16.728	43.978	53.392
#15	19.284	14.098	45.302	67.953
#16	16.435	15.705	57.289	57.069
#17	17.093	16.435	51.994	58.098
#18	13.879	12.856	46.773	73.321
#19	15.778	16.581	53.392	63.54
#20	17.969	18.846	48.391	67.879
#21	14.828	14.828	48.244	64.129
#22	18.992	18.408	47.508	55.009
#23	17.823	14.901	41.551	50.082
#24	15.121	17.823	50.376	63.099
#25	15.121	17.677	51.7	56.774
#26	16.07	18.042	51.847	71.777
#27	11.98	18.846	40.154	66.188
#28	14.098	15.413	52.73	78.249
#29	16.289	16.07	44.64	59.201
#30	17.604	16.07	47.655	50.229
#31	15.559	17.531	48.464	67.585
#32	15.632	17.166	35.08	51.921
#33	16.07	17.458	49.2	57.657
#34	16.07	16.508	61.849	73.91
#35	17.385	15.778	44.567	55.377
#36	17.604	17.677	49.862	57.657
#37	12.418	17.093	41.478	66.85
#38	15.851	15.194	48.17	52.288
#39	15.486	20.088	46.332	67.879
#40	16.728	15.047	51.847	61.113
#41	15.705	17.677	48.832	60.893
#42	17.677	12.856	51.553	56.407
#43	14.025	17.458	36.477	76.851
#44	16.435	14.609	52.362	48.097
#45	11.76	14.39	46.332	71.115
#46	13.952	18.7	54.348	74.939
#47	16.947	16.581	46.626	66.556
#48	16.654	15.413	50.376	53.392
#49	15.997	16.216	50.45	68.026
#50	16.216	17.239	45.67	67.512
#51	16.435	11.395	45.596	70.674
#52	15.851	16.947	53.759	70.674
#53	16.947	17.166	54.862	78.396
#54	16.362	14.317	47.508	73.689
#55	15.34	16.362	56.26	53.024
#56	15.705	17.166	57.216	56.848
#57	18.408	16.07	49.273	59.275
#58	17.312	15.413	55.671	62.878
#59	16.289	15.267	35.08	78.911
#60	14.025	18.042	49.641	68.688
#61	17.02	16.362	50.523	72.586
#62	17.239	17.604	46.258	71.63
#63	16.289	15.486	49.42	62.658
#64	18.188	13.66	51.774	78.175
#65	16.143	17.385	53.024	51.774
#66	17.093	16.874	39.639	54.348
#67	15.413	16.07	47.435	52.509
#68	16.07	17.823	48.832	51.553
#69	17.02	18.554	46.626	69.791
#70	18.627	15.194	53.318	58.76
#71	18.335	18.115	50.523	63.761
#72	15.851	15.778	51.7	52.215
#73	16.289	15.632	41.551	61.261
#74	17.969	17.093	49.862	51.112
#75	17.239	16.728	39.713	64.129

## Sheet: Fig. 8B
	% of oocytes giving rise to stage 2 embryos
	Replicates	Atad2 WT	Atad2 KO
	#1	40	17
	#2	35	16
	#3	13	7
	#4	14	8

## Sheet: Fig. 8C
	Atad2 WT males						Atad2 KO males
	# 1	# 2	# 3	# 4	# 5		# 1	# 2	# 3	# 4	# 5
Number of pups per litter	6	6	7	7	9		6	9	7	8	8
	8	9	7	10	8		9	12	6	9	5
	10	4	9	6	10		10	9	3	5	11
	8	8	9	7	11		4	8	8	6	3
	-	9	8	8	8		10	8	4	5	10
	-	6	3	10	8		2	6	8	6	8

## Sheet: Fig. 6-Supp.2A
Testes W/Body W*1000
Replicates	Atad2 WT	Atad2 KO
#1	7.3464	6.66667
#2	6.54176	5.10054
#3	6.12133	5.54891
#4	7.21616	6.71733
#5	7.83938	6.34168
#6	8.10419	7.35691

## Sheet: Fig. 6-Supp.2B
N° of sperm (*10^6)
Replicates	Atad2 WT	Atad2 KO
#1	24.48	13.8
#2	22.98	17.94
#3	26.1	16.32
#4	27.3	16.6
#5	12.6	7.7
#6	16.2	10.1
