# Supplementary figures and images for: ATAD2 mediates chromatin-bound histone chaperone turnover
Source: eLife journal article supplement (doi:10.7554/elife.107582), 2025-09-22

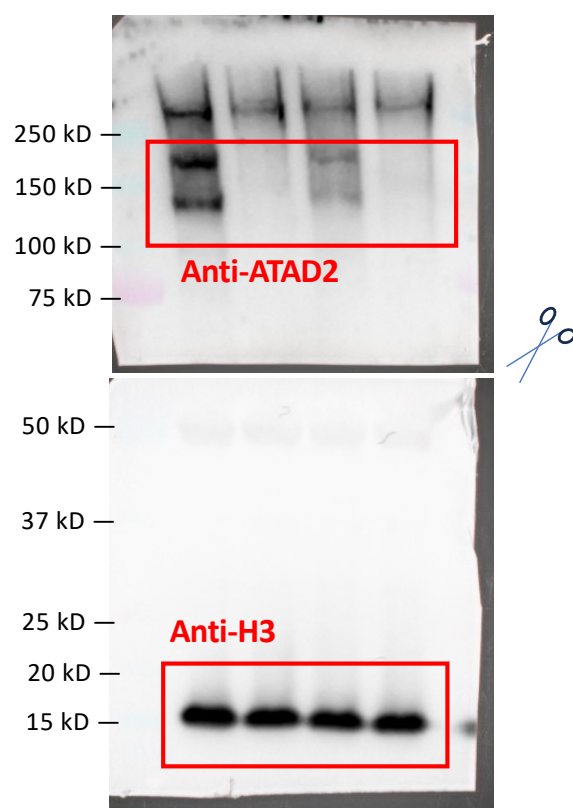

Supplement: fig1-data1 [file Figure 1C-source data 1.pdf › Figure 1C source data 1/Figure 1C-source data 1.pdf]

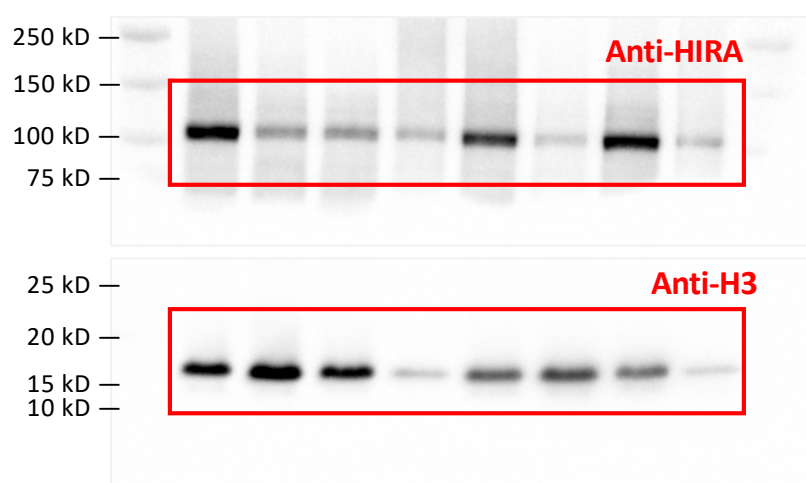

Supplement: fig2-data3 [file Figure 2B - source data 1.pdf › Figure 2B source data 1/Figure 2B - source data 1.pdf]

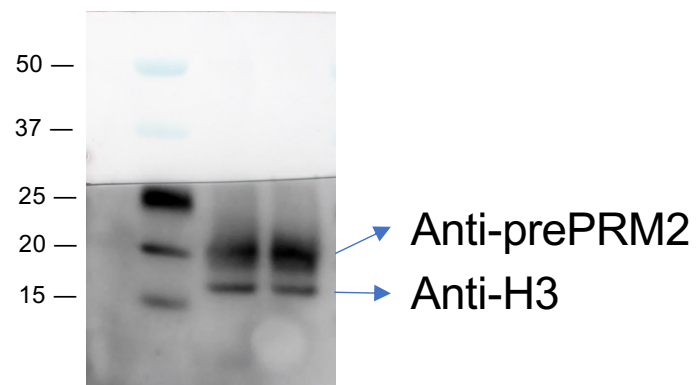

Supplement: fig7-figsupp1-data1 [file Figure 7-figure supplement 1 source data1.pdf › Figure 7-figure supplement 1 source data 1/Figure 7-figure supplement 1 source data1.pdf]
